# Supplementary material for: Tuberculosis Treatment Outcome and Predictors in Africa: A Systematic Review and Meta-Analysis
Source: MDPI journal article supplement (doi:10.3390/ijerph182010678), 2021-10-12
Supplement: s1 [file s1]

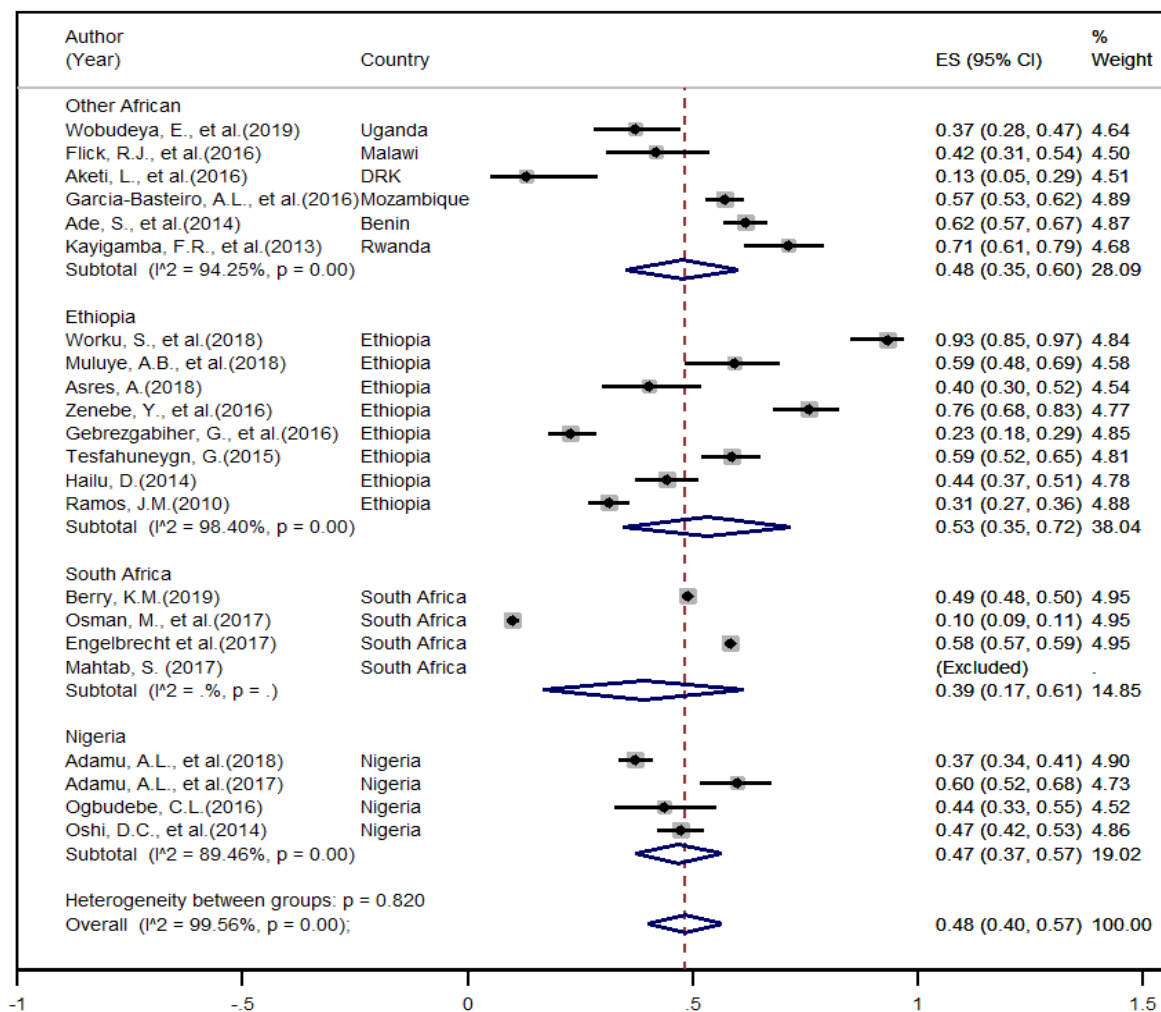

Figure S1: Pooled and study-specific rate of unsuccessful treatment outcome related to death

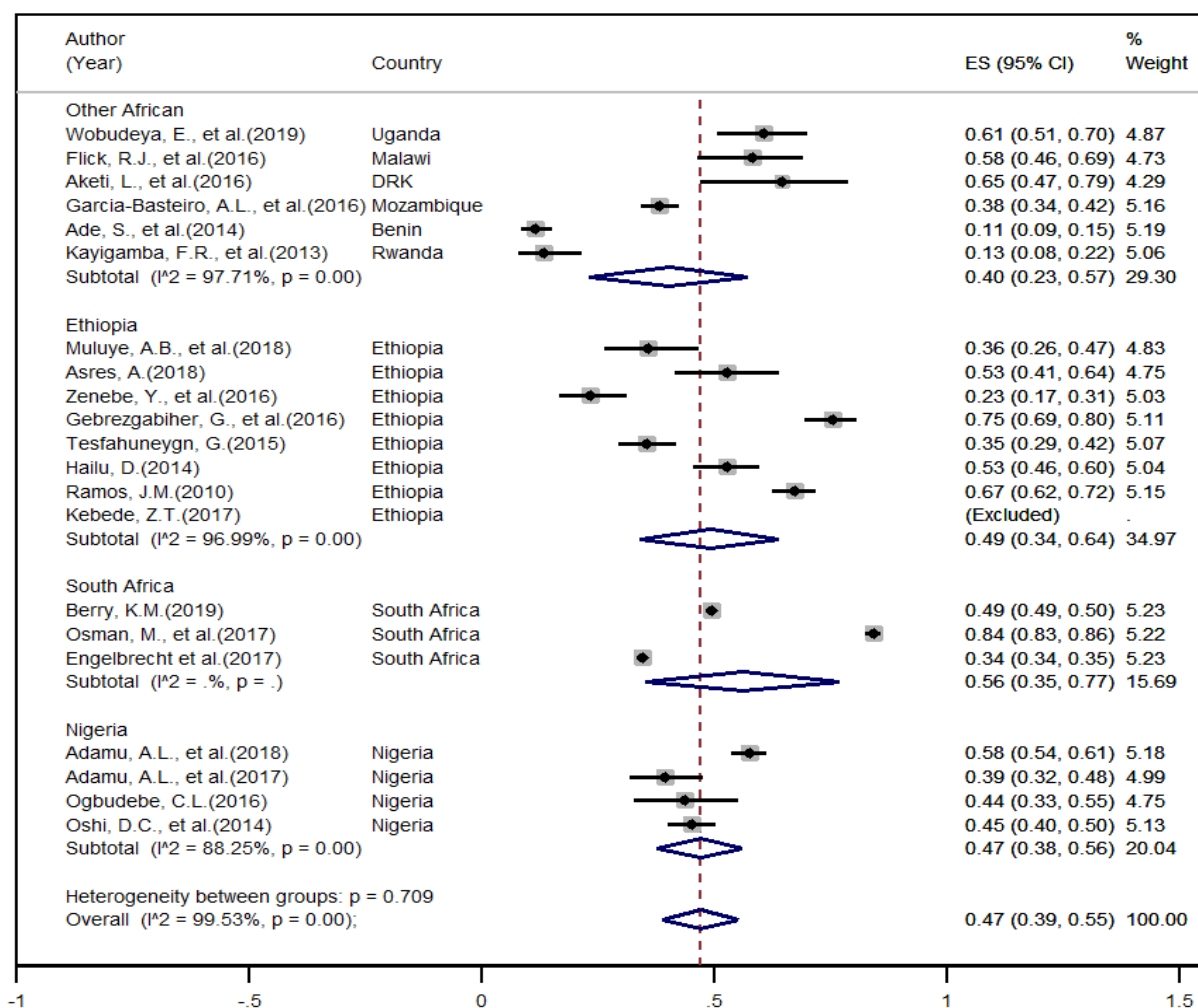

Figure S2: Pooled and study-specific rate of unsuccessful treatment outcome related to the defaulter.

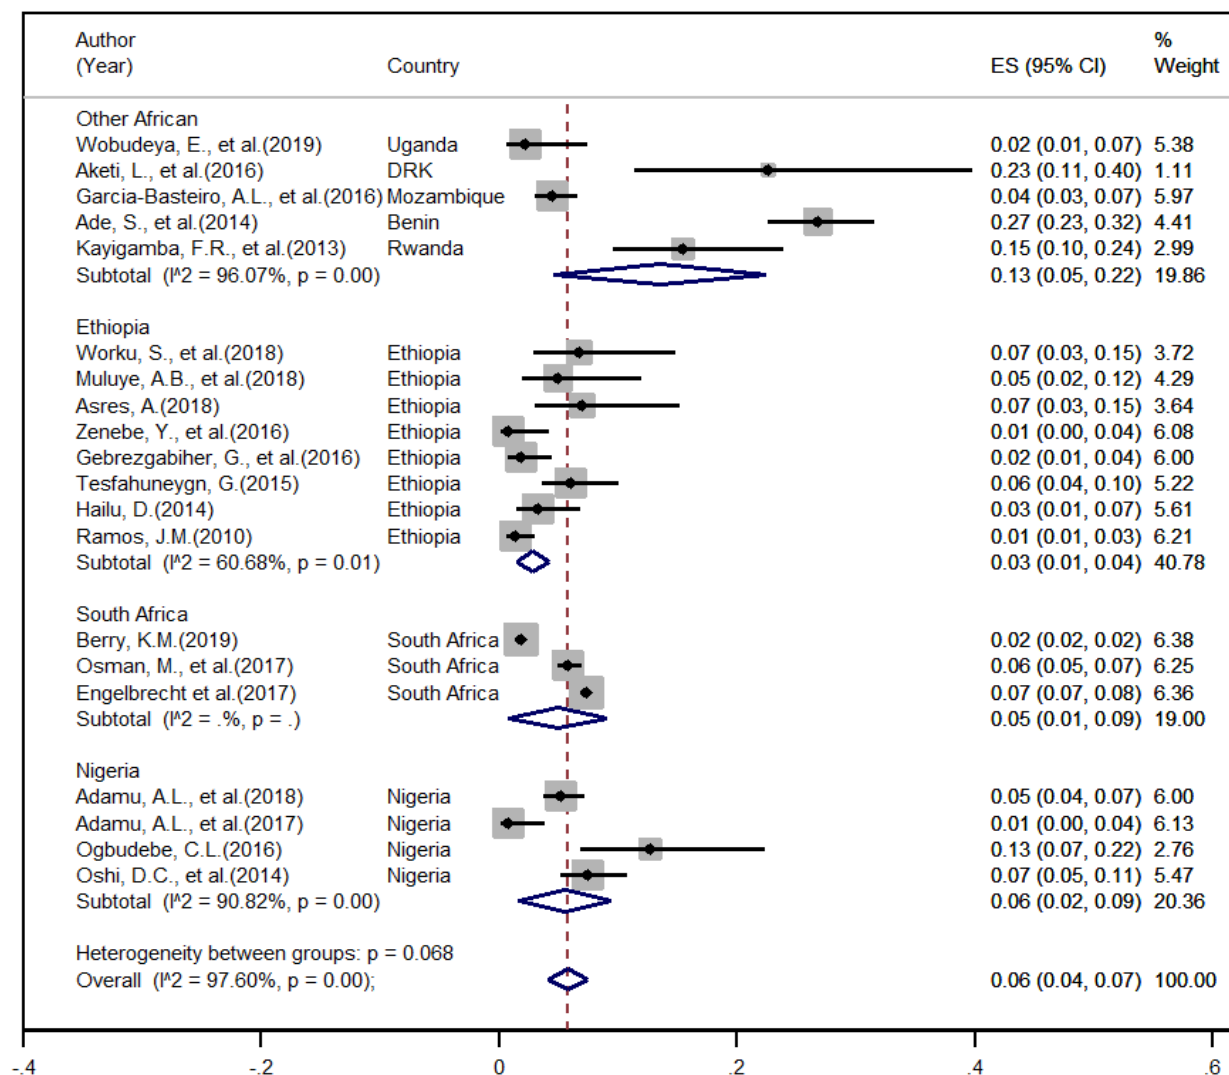

Figure S3: Pooled and study-specific rate of unsuccessful treatment outcome related to the failure.

Supplementary Figure 4:

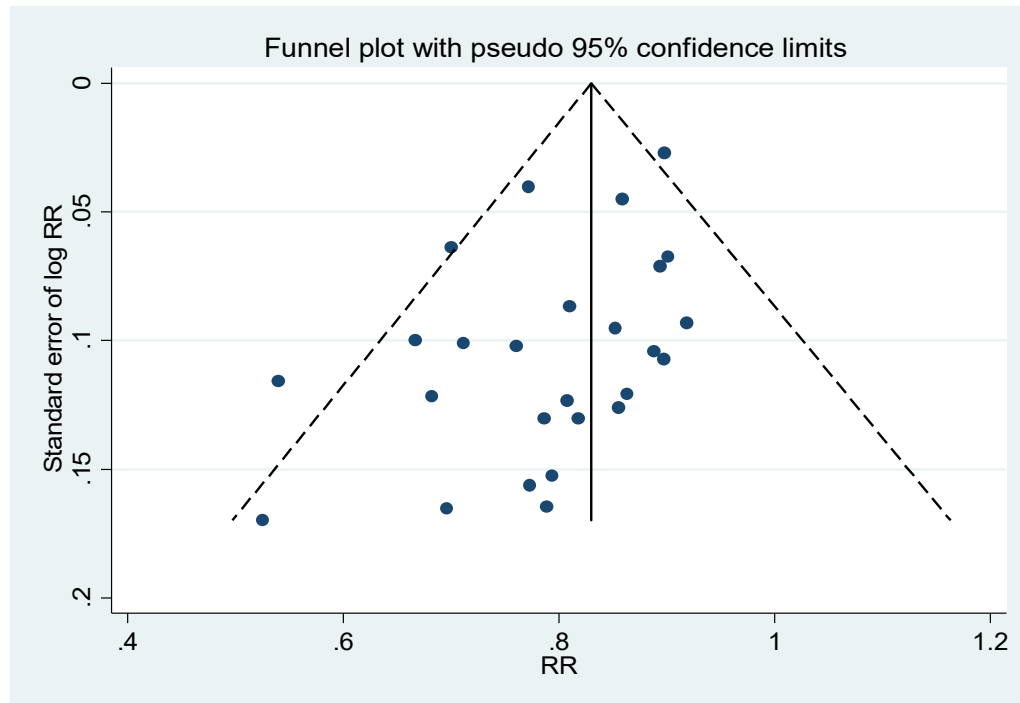

Figure S4: Funnel plots of standard error with RR and pseudo 95% confidence limits that used to evaluate publication bias
