# Supplementary material for: Tuberculosis Treatment Outcome and Predictors in Africa: A Systematic Review and Meta-Analysis
Source: MDPI journal article supplement (doi:10.3390/ijerph182010678), 2021-10-12
Supplement: s1 [file s1]

### **File Supplementary 1, Systematic Electronic search Term**

((((((((((((Determinants) OR Factors) OR "Risk factors"[MeSH Terms]) OR "Risk factors") OR Cause) OR Reason)) AND (((((((Determinants) OR "Epidemiologic factors"[MeSH Terms]) OR "Epidemiologic factors") OR "Risk Factors"[MeSH Terms]) OR "Risk Factors") OR Factors) OR cause) OR reason)) AND (((Lung[MeSH Terms]) OR Lung) OR Pulmonary) OR "Extra Pulmonary")) OR (((Tuberculosis[MeSH Terms]) OR Tuberculosis) OR TB) OR Mycobacterium)) AND (((Infection[MeSH Terms]) OR Infection) OR Disease[MeSH Terms]) OR Disease) OR Disorder)) AND (((((((("Treatment outcome"[MeSH Terms]) OR "Treatment outcome") OR "Treatment adherence") OR Default) OR "Lost to follow up") OR "Treatment Failure") OR Refusal) OR "Transfer to care") OR Death)) AND (((Developing) OR "Resource limited") OR Poor)) AND (((Country) OR Nation) OR Region)))

**Table S1. (Supporting information);** Shows study level risk of bias measurement score using the Joanna Briggs Institute (JBI) critical appraisal assessment tool.

| Included studies                    | Reviewer #1 | Total No Yes (Y) | Reviewer #2   | Total No Yes (Y) | Average Yes (Y) | Percentage of Yes (Y) | Judgment |
|-------------------------------------|-------------|------------------|---------------|------------------|-----------------|-----------------------|----------|
| Wobudeya, E., et al.(2019)          | Y           | 7                | Y             | 7                | 7               | 77.80%                | Low      |
| Mirutse, G., et al.(2019)           | Y           | 7                | Y             | 6                | 6.5             | 72.20%                | Low      |
| Berry, K.M.(2019)                   | Y           | 7                | Y             | 7                | 7               | 77.80%                | Low      |
| Worku, S., et al.(2018)             | Y           | 6                | Y             | 7                | 6.5             | 72.20%                | Low      |
| Muluye, A.B., et al.(2018)          | Y           | 7                | Y             | 7                | 7               | 77.80%                | Low      |
| Asres, A.(2018)                     | Y           | 7                | Y             | 6                | 6.5             | 72.20%                | Low      |
| Adamu, A.L., et al.(2018)           | Y           | 6                | Y             | 6                | 6               | 66.70%                | Moderate |
| Pizzol, D., et al.(2018)            | Y           | 6                | Y             | 6                | 6               | 66.70%                | Moderate |
| Osman, M., et al.(2017)             | Y           | 8                | Y             | 8                | 8               | 88.90%                | Low      |
| Engelbrecht et al.(2017)            | Y           | 8                | Y             | 8                | 8               | 88.90%                | Low      |
| Mahtab, S. (2017)                   | Y           | 8                | Y             | 7                | 7.5             | 83.30%                | Low      |
| Kebede, Z.T.(2017)                  | Y           | 6                | Y             | 6                | 6               | 66.70%                | Moderate |
| Adamu, A.L., et al.(2017)           | Y           | 6                | Y             | 6                | 6               | 66.70%                | Moderate |
| Flick, R.J., et al.(2016)           | Y           | 6                | Y             | 6                | 6               | 66.70%                | Moderate |
| Aketi, L., et al.(2016)             | Y           | 6                | Y             | 6                | 6               | 66.70%                | Moderate |
| Zenebe, Y., et al.(2016)            | Y           | 6                | Y             | 6                | 6               | 66.70%                | Moderate |
| Tilahun, G.(2016)                   | Y           | 6                | Y             | 6                | 6               | 66.70%                | Moderate |
| Garcia-Basteiro, A.L., et al.(2016) | Y           | 8                | Y             | 7                | 7.5             | 83.30%                | Low      |
| Ogbudebe, C.L.(2016)                | Y           | 7                | Y             | 7                | 7               | 77.80%                | Low      |
| Gebrezgabiher, G., et al.(2016)     | Y           | 8                | Y             | 8                | 8               | 88.90%                | Low      |
| Tesfahuneygn, G.(2015)              | Y           | 7                | Y             | 7                | 7               | 77.80%                | Low      |
| Hailu, D.(2014)                     | Y           | 8                | Y             | 7                | 7.5             | 83.30%                | Low      |
| Oshi, D.C., et al.(2014)            | Y           | 7                | Y             | 7                | 7               | 77.80%                | Low      |
| Ade, S., et al.(2014)               | Y           | 8                | Y             | 7                | 7.5             | 83.30%                | Low      |
| Kayigamba, F.R., et al.(2013)       | Y           | 6                | Y             | 7                | 6.5             | 72.20%                | Low      |
| Ramos, J.M.(2010)                   | Y           | 7                | Y             | 7                | 7               | 77.80%                | Low      |
| <b>Subtotal</b>                     |             |                  |               |                  |                 |                       |          |
| <b>Y = Yes</b>                      |             |                  | <b>75.43%</b> |                  |                 |                       |          |
| <b>N = No</b>                       |             |                  | <b>24.62%</b> |                  |                 |                       |          |

**Note.** Study level risk of bias is calculated from the domain of nine criteria.
